# Supplementary material for: An integrative genomics approach identifies Hypoxia Inducible Factor-1 (HIF-1)-target genes that form the core response to hypoxia
Source: PubMed Central journal article supplement — Nucleic Acids Res. 2009 Jun 2;37(14):4587–602. doi: 10.1093/nar/gkp425 (PMC2724271; doi:10.1093/nar/gkp425), 2009-06-02
Supplement: gkp425_2.pdf [file gkp425_2.pdf]

| Distance from HIF site | name       | mean p-value    | p-value range in 100 iterations | found significant in 100 iterations | found in foreground | found in background | range in background /total                       | genes                                                                                                                                           | organism                                                                                                                                                                                                                                                                                                                                                                         | References illustrating relevance to HIF-1 (PubMed ID) |
|------------------------|------------|-----------------|---------------------------------|-------------------------------------|---------------------|---------------------|--------------------------------------------------|-------------------------------------------------------------------------------------------------------------------------------------------------|----------------------------------------------------------------------------------------------------------------------------------------------------------------------------------------------------------------------------------------------------------------------------------------------------------------------------------------------------------------------------------|--------------------------------------------------------|
| ±25                    | SP         | 0.00120         | 1.6e-06-9.9e-03                 | 100                                 | 6/81                | 10/881              | 5-17/881                                         | BNIP3, CAD, P4HA2, R3HDM1, RBPJ, WSB1                                                                                                           | chick, clawed frog, domestic pig, hamster, human, monkey, mouse, rabbit, rat                                                                                                                                                                                                                                                                                                     | 15342781                                               |
| ±75                    | ATF6       | 0.00005         | 1.3e-06-4.4e-04                 | 98                                  | 4/81                | 2/881               | 1-4/881                                          | LDHA, OXSR1, SPAG4, WSB1                                                                                                                        | human                                                                                                                                                                                                                                                                                                                                                                            |                                                        |
|                        | JUN:ATF2   | 0.00012         | 1.3e-06-4.4e-04                 | 100                                 | 4/81                | 2/881               | 1-4/881                                          | LDHA, OXSR1, SPAG4, WSB1                                                                                                                        | chick, human, mouse, rat                                                                                                                                                                                                                                                                                                                                                         | 11739718, 17189420                                     |
|                        | CREB1      | 0.00058         | 2.2e-06-5.9e-03                 | 100                                 | 5/81                | 6/881               | 3-11/881                                         | LDHA, OXSR1, PJA2, SPAG4, WSB1                                                                                                                  | HTLV-I, cattle, hamster, human, mink, mouse, rat                                                                                                                                                                                                                                                                                                                                 | 16854377                                               |
|                        | CREB:ATF   | 0.01887         | 1.3e-04-9.4e-02                 | 96                                  | 3/81                | 4/881               | 1-8/881                                          | LDHA, OXSR1, SPAG4                                                                                                                              | clawed frog, gibbon ape, human, mouse, rat                                                                                                                                                                                                                                                                                                                                       | 8524640                                                |
| ±100                   | WT1        | 0.02165         | 1.3e-04-9.4e-02                 | 93                                  | 3/81                | 4/881               | 1-8/881                                          | LDHA, SNRPD1, STC2                                                                                                                              | human, mouse, rat                                                                                                                                                                                                                                                                                                                                                                | 12738801                                               |
| ±125                   | SP1        | 0.01905         | 8.4e-04-6.7e-02                 | 94                                  | 8/81                | 29/881              | 20-38/881                                        | ASCC1, MIF, NF2, OXSR1, P4HA2, R3HDM1, RBPJ, TGFB1                                                                                              | human, mouse, rat                                                                                                                                                                                                                                                                                                                                                                | 15342781                                               |
| ±150                   | PAX2       | 0.00040         | 1.3e-04-4.0e-03                 | 53                                  | 3/81                | 1/881               | 1-3/881                                          | ATF7IP, NDRG1, RARA                                                                                                                             | chick, human, mouse, zebra fish                                                                                                                                                                                                                                                                                                                                                  |                                                        |
|                        | ATF2       | 0.00057         | 2.2e-06-3.5e-03                 | 100                                 | 5/81                | 6/881               | 3-10/881                                         | LDHA, OXSR1, PER2, SPAG4, WSB1                                                                                                                  | human, mouse                                                                                                                                                                                                                                                                                                                                                                     | 17189429                                               |
|                        | SRY        | 0.00154         | 1.3e-06-1.2e-02                 | 99                                  | 4/81                | 4/881               | 1-8/881                                          | ATF7IP, EFNA1, MRPL4, TMEM45A                                                                                                                   | human, mouse                                                                                                                                                                                                                                                                                                                                                                     |                                                        |
| Entire promoter        | MAT1       | 0.00000         | 2.8e-09-5.9e-05                 | 100                                 | 6/81                | 4/881               | 2-8/881                                          | ABC2, EFNA1, MRPS12, MX11, NAMPT, WSB1                                                                                                          | fission yeast                                                                                                                                                                                                                                                                                                                                                                    |                                                        |
|                        | FOXD1      | 0.00002         | 3.7e-08-1.4e-04                 | 100                                 | 6/81                | 6/881               | 3-9/881                                          | CCNB1, CLK3, DHX40, GOPC, MX11, TMEM45A                                                                                                         | human                                                                                                                                                                                                                                                                                                                                                                            |                                                        |
|                        | CACD       | 0.00007         | 2.2e-06-4.3e-04                 | 100                                 | 5/81                | 4/881               | 3-7/881                                          | ALDOC, ASPH, CRKL, GYS1, OXSR1                                                                                                                  | mouse                                                                                                                                                                                                                                                                                                                                                                            |                                                        |
|                        | FOXO4      | 0.00010         | 8.5e-07-1.0e-03                 | 100                                 | 7/81                | 11/881              | 7-16/881                                         | ANKRD37, ATF7IP, CLK3, DDIT4, EFNA1, JMJD1A, LOX                                                                                                | human, mouse                                                                                                                                                                                                                                                                                                                                                                     |                                                        |
|                        | AHR:HIF-1  | 0.00022         | 1.7e-05-4.4e-04                 | 100                                 | 4/81                | 3/881               | 2-4/881                                          | ANKRD37, EIF2B3, P4HA2, PER2                                                                                                                    | guinea pig, human, killifish, mouse, pig, rabbit, rat                                                                                                                                                                                                                                                                                                                            |                                                        |
|                        | NFIC       | 0.00055         | 1.3e-06-3.1e-03                 | 100                                 | 4/81                | 3/881               | 1-6/881                                          | MRPL4, NAMPT, OXSR1, TPCN1                                                                                                                      | cat, chick, clawed frog, domestic pig, hamster, human, monkey, mouse, rat, sheep                                                                                                                                                                                                                                                                                                 |                                                        |
|                        | STAT       | 0.00063         | 1.7e-05-2.6e-03                 | 100                                 | 8/81                | 18/881              | 13-23/881                                        | EFNA1, FH, GADD45B, GRK6, INSIG2, LOX, PGK1, SPAG4                                                                                              | human, mouse, rat, sheep                                                                                                                                                                                                                                                                                                                                                         |                                                        |
|                        | ID1        | 0.00070         | 1.3e-05-3.5e-03                 | 100                                 | 5/81                | 7/881               | 4-10/881                                         | GYS1, MRPS12, MX11, PJA2, WSB1                                                                                                                  | maize                                                                                                                                                                                                                                                                                                                                                                            |                                                        |
|                        | TP53:TP73  | 0.00076         | 1.7e-05-1.3e-03                 | 100                                 | 4/81                | 4/881               | 2-5/881                                          | ATF3, DDIT4, NAMPT, RBPJ                                                                                                                        | Chinese hamster (Gray hamster), cat, cattle, dog, golden (Syrian) hamster, human, macaque, monkey, mouse, pig, rabbit, rat, sheep                                                                                                                                                                                                                                                |                                                        |
|                        | FOXF2      | 0.00188         | 2.2e-06-9.4e-03                 | 100                                 | 5/81                | 8/881               | 3-12/881                                         | CAD, CLK3, DDIT4, DHX40, EFNA1                                                                                                                  | human                                                                                                                                                                                                                                                                                                                                                                            |                                                        |
|                        | GRH        | 0.00294         | 1.3e-04-4.0e-03                 | 100                                 | 3/81                | 2/881               | 1-3/881                                          | C3orf28, CXCR4, NF2                                                                                                                             | Caenorhabditis elegans, fruit fly                                                                                                                                                                                                                                                                                                                                                |                                                        |
|                        | EBOX       | 0.00476         | 4.8e-05-2.0e-02                 | 100                                 | 7/81                | 18/881              | 11-25/881                                        | CAD, JMJD2B, JMJD2C, RARA, RBPJ, RSBN1, SLC16A1                                                                                                 | Avian myelocytomatosis virus CM11, Avian myelocytomatosis virus MC29, Feline leukemia provirus FTT, HBI, Kenyan clawed frog, MH2E21, OK10, canary, cattle, chick, chimpanzee, clawed frog, common carp, common marmoset, dog, domestic pig, duck, gibbon ape, goldfish, hamster, human, monkey, mouse, quail, rabbit, rainbow trout, rat, sheep, wild cat, woodchuck, zebra fish |                                                        |
|                        | EGR        | 0.00479         | 5.1e-04-1.6e-02                 | 100                                 | 10/81               | 35/881              | 28-42/881                                        | C14orf169, ERO1L, GYS1, INSIG2, KLF10, PJA2, R3HDM1, SEC61G, SLC16A1, TGFB1                                                                     | human, monkey, mouse, rat                                                                                                                                                                                                                                                                                                                                                        |                                                        |
|                        | REB1       | 0.00522         | 1.3e-04-1.1e-02                 | 100                                 | 3/81                | 3/881               | 1-4/881                                          | ATF3, R3HDM1, RARA                                                                                                                              | yeast                                                                                                                                                                                                                                                                                                                                                                            |                                                        |
|                        | NRF1       | 0.00541         | 8.2e-04-1.3e-02                 | 100                                 | 13/81               | 53/881              | 45-60/881                                        | ANKRD37, ASCC1, ATF7IP, EDEM3, EIF1, GOPC, HIG2, ILF3, JMJD1A, NARF, P4HA1, PPME1, SFRS7                                                        | human, monkey                                                                                                                                                                                                                                                                                                                                                                    |                                                        |
|                        | BACH2      | 0.00814         | 1.3e-04-4.0e-02                 | 99                                  | 3/81                | 3/881               | 1-6/881                                          | JMJD1A, RBPJ, SFRS7                                                                                                                             | human, mouse                                                                                                                                                                                                                                                                                                                                                                     |                                                        |
|                        | FOXJ1      | 0.01085         | 1.1e-04-4.3e-02                 | 100                                 | 4/81                | 7/881               | 3-11/881                                         | ANKRD37, MRPL4, MX11, OXSR1                                                                                                                     | human, mouse, rat                                                                                                                                                                                                                                                                                                                                                                |                                                        |
|                        | TBX5       | 0.01155         | 4.3e-04-3.8e-02                 | 100                                 | 5/81                | 12/881              | 7-16/881                                         | ATF3, KLF10, R3HDM1, RARA, RSBN1                                                                                                                | chick, clawed frog, human, mouse                                                                                                                                                                                                                                                                                                                                                 |                                                        |
|                        | MIBP1:RFX1 | 0.01657         | 1.3e-04-4.0e-02                 | 100                                 | 3/81                | 4/881               | 1-6/881                                          | PPME1, SNRPD1, TPCN1                                                                                                                            | human                                                                                                                                                                                                                                                                                                                                                                            |                                                        |
|                        | MAFB       | 0.01700         | 1.0e-03-4.0e-02                 | 100                                 | 3/81                | 4/881               | 2-6/881                                          | ATF3, LDHA, SPAG4                                                                                                                               | Rattus                                                                                                                                                                                                                                                                                                                                                                           |                                                        |
|                        | USF2:USF1  | 0.01848         | 1.3e-05-6.3e-02                 | 97                                  | 5/81                | 13/881              | 4-18/881                                         | JMJD2C, RARA, SLC16A1, STC2, TPCN1                                                                                                              | Kenyan clawed frog, chick, duck, hamster, human, mouse, rabbit, rat                                                                                                                                                                                                                                                                                                              |                                                        |
|                        | FOXA1      | 0.02149         | 4.4e-04-7.9e-02                 | 92                                  | 4/81                | 8/881               | 4-13/881                                         | CAD, DDIT4, EFNA1, MX11                                                                                                                         | human, rat                                                                                                                                                                                                                                                                                                                                                                       |                                                        |
|                        | RBPJ       | 0.02425         | 4.7e-03-7.2e-02                 | 96                                  | 6/81                | 19/881              | 15-25/881                                        | CCNB1, FH, LOX, R3HDM1, RARA, RBPJ                                                                                                              | fruit fly, human, mouse                                                                                                                                                                                                                                                                                                                                                          |                                                        |
|                        | FOXJ2      | 0.02631         | 1.9e-03-1.1e-01                 | 90                                  | 5/81                | 14/881              | 9-21/881                                         | CLK3, EFNA1, LOX, MX11, RSBN1                                                                                                                   | human, mouse                                                                                                                                                                                                                                                                                                                                                                     |                                                        |
|                        | YY1        | 0.02732         | 8.8e-03-5.6e-02                 | 94                                  | 12/81               | 58/881              | 51-65/881                                        | ASCC1, ATF7IP, CRKL, EIF2B3, GOPC, ILF3, INSIG2, JMJD1A, PJA2, R3HDM1, SNRPD1, WSB1                                                             | chick, human, mouse, rat                                                                                                                                                                                                                                                                                                                                                         |                                                        |
|                        | PHO4       | 0.02929         | 1.3e-04-1.3e-01                 | 86                                  | 3/81                | 5/881               | 1-9/881                                          | BNIP3, GADD45B, JMJD2B                                                                                                                          | yeast                                                                                                                                                                                                                                                                                                                                                                            |                                                        |
|                        | FOXO1      | 0.03347         | 3.5e-03-1.4e-01                 | 83                                  | 5/81                | 15/881              | 10-22/881                                        | ATF7IP, CAD, CLK3, DDIT4, EFNA1                                                                                                                 | human, mouse                                                                                                                                                                                                                                                                                                                                                                     |                                                        |
| AP-1                   | 0.03451    | 6.9e-03-1.3e-01 | 80                              | 7/81                                | 26/881              | 21-36/881           | ACTR1A, ATF7IP, HIG2, JMJD1A, RBPJ, SFRS7, SPAG4 | ASV 17, Japanese pufferfish, Japanese quail, chick, clawed frog, domestic pig, fruit fly, gibbon ape, hamster, human, monkey, mouse, rat, yeast |                                                                                                                                                                                                                                                                                                                                                                                  |                                                        |
| BR                     | 0.03944    | 5.0e-03-8.9e-02 | 74                              | 7/81                                | 27/881              | 20-33/881           | DDIT4, ERO1L, HIG2, MRPL4, MX11, NXF1, OXSR1     | fruit fly                                                                                                                                       |                                                                                                                                                                                                                                                                                                                                                                                  |                                                        |

|                     | Distance from HIF site | name      | mean p-value    | p-value range in 100 iterations | found significant in 100 iterations | found in foreground | found in background | range in background /total                  | genes                                                             | organism                                                                                                                                                                                                                                                                                                                                                                            |
|---------------------|------------------------|-----------|-----------------|---------------------------------|-------------------------------------|---------------------|---------------------|---------------------------------------------|-------------------------------------------------------------------|-------------------------------------------------------------------------------------------------------------------------------------------------------------------------------------------------------------------------------------------------------------------------------------------------------------------------------------------------------------------------------------|
| <b>Up Regulated</b> | <b>± 75</b>            | ATF6      | 6E-06           | 2.5e-08-1.4e-04                 | 88                                  | 4/60                | 2/860               | 1-5/860                                     | LDHA, OXSR1, SPAG4, WSB1                                          | human                                                                                                                                                                                                                                                                                                                                                                               |
|                     |                        | JUN:ATF2  | 8E-06           | 2.5e-08-1.4e-04                 | 91                                  | 4/60                | 2/860               | 1-5/860                                     | LDHA, OXSR1, SPAG4, WSB1                                          | chick, human, mouse, rat                                                                                                                                                                                                                                                                                                                                                            |
|                     |                        | CREB1     | 1E-04           | 4.2e-08-1.4e-03                 | 100                                 | 5/60                | 7/860               | 3-12/860                                    | LDHA, OXSR1, PJA2, SPAG4, WSB1                                    | HTLV-I, cattle, hamster, human, mink, mouse, rat                                                                                                                                                                                                                                                                                                                                    |
|                     |                        | CREB:ATF  | 7E-03           | 9.5e-06-5.1e-02                 | 97                                  | 3/60                | 4/860               | 1-9/860                                     | LDHA, OXSR1, SPAG4                                                | clawed frog, gibbon ape, human, mouse, rat                                                                                                                                                                                                                                                                                                                                          |
|                     | <b>± 100</b>           | NRF1      | 9E-03           | 2.9e-04-3.6e-02                 | 100                                 | 6/60                | 21/860              | 14-29/860                                   | ANKRD37, EIF1, HIG2, JMJD1A, NARF, P4HA1                          | human, monkey                                                                                                                                                                                                                                                                                                                                                                       |
|                     | <b>± 150</b>           | ATF2      | 1E-04           | 2.6e-09-2.3e-03                 | 100                                 | 5/60                | 6/860               | 2-13/860                                    | LDHA, OXSR1, PER2, SPAG4, WSB1                                    | human, mouse                                                                                                                                                                                                                                                                                                                                                                        |
|                     | <b>Entire promoter</b> | ID1       | 2E-05           | 2.5e-08-1.4e-04                 | 100                                 | 4/60                | 3/860               | 1-5/860                                     | GYS1, MXI1, PJA2, WSB1                                            | maize                                                                                                                                                                                                                                                                                                                                                                               |
|                     |                        | AHR:HIF-1 | 6E-05           | 9.5e-06-1.2e-04                 | 95                                  | 3/60                | 1/860               | 1-2/860                                     | ANKRD37, P4HA2, PER2                                              | guinea pig, human, killifish, mouse, pig, rabbit, rat                                                                                                                                                                                                                                                                                                                               |
|                     |                        | TP53:TP73 | 9E-05           | 6.3e-07-1.4e-04                 | 100                                 | 4/60                | 4/860               | 2-5/860                                     | ATF3, DDIT4, NAMPT, RBPJ                                          | Chinese hamster (Gray hamster), cat, cattle, dog, golden (Syrian) hamster, human, macaque, monkey, mouse, pig, rabbit, rat, sheep                                                                                                                                                                                                                                                   |
|                     |                        | FOXO4     | 1E-04           | 6.0e-07-8.2e-04                 | 100                                 | 6/60                | 11/860              | 7-16/860                                    | ANKRD37, CLK3, DDIT4, EFNA1, JMJD1A, LOX                          | human, mouse                                                                                                                                                                                                                                                                                                                                                                        |
|                     |                        | PHO4      | 3E-04           | 9.5e-06-2.3e-03                 | 92                                  | 3/60                | 1/860               | 1-4/860                                     | BNIP3, GADD45B, JMJD2B                                            | yeast                                                                                                                                                                                                                                                                                                                                                                               |
|                     |                        | FOXO1     | 5E-04           | 2.1e-06-2.3e-03                 | 100                                 | 5/60                | 9/860               | 5-13/860                                    | CLK3, DHX40, GOPC, MXI1, TMEM45A                                  | human                                                                                                                                                                                                                                                                                                                                                                               |
|                     |                        | FOXO2     | 2E-03           | 6.3e-06-1.1e-02                 | 100                                 | 4/60                | 7/860               | 3-11/860                                    | CLK3, DDIT4, DHX40, EFNA1                                         | human                                                                                                                                                                                                                                                                                                                                                                               |
|                     |                        | EBOX      | 2E-03           | 3.9e-05-7.4e-03                 | 100                                 | 6/60                | 17/860              | 11-22/860                                   | JMJD2B, JMJD2C, RARA, RBPJ, RSBN1, SLC16A1                        | Avian myelocytomatosis virus CM11., Avian myelocytomatosis virus MC29., Feline leukemia provirus FTT., HBI, Kenyan clawed frog, MH2E21, OK10, canary, cattle, chick, chimpanzee, clawed frog, common carp, common marmoset, dog, domestic pig, duck, gibbon ape, goldfish, hamster, human, monkey, mouse, quail, rabbit, rainbow trout, rat, sheep, wild cat, woodchuck, zebra fish |
|                     |                        | BACH2     | 3E-03           | 9.5e-06-2.1e-02                 | 100                                 | 3/60                | 3/860               | 1-7/860                                     | JMJD1A, RBPJ, SFRS7                                               | human, mouse                                                                                                                                                                                                                                                                                                                                                                        |
|                     |                        | CACD      | 4E-03           | 1.9e-04-1.5e-02                 | 100                                 | 5/60                | 13/860              | 9-18/860                                    | ALDOC, ASPH, CRKL, GYS1, OXSR1                                    | mouse                                                                                                                                                                                                                                                                                                                                                                               |
|                     |                        | STAT      | 6E-03           | 5.0e-04-2.5e-02                 | 100                                 | 6/60                | 20/860              | 15-27/860                                   | EFNA1, GADD45B, INSIG2, LOX, PGK1, SPAG4                          | human, mouse, rat, sheep                                                                                                                                                                                                                                                                                                                                                            |
|                     |                        | TBX5      | 7E-03           | 4.1e-04-3.2e-02                 | 100                                 | 4/60                | 9/860               | 6-14/860                                    | ATF3, KLF10, RARA, RSBN1                                          | chick, clawed frog, human, mouse                                                                                                                                                                                                                                                                                                                                                    |
|                     |                        | FOXJ2     | 9E-03           | 1.9e-04-2.6e-02                 | 100                                 | 5/60                | 15/860              | 9-20/860                                    | CLK3, EFNA1, LOX, MXI1, RSBN1                                     | human, mouse                                                                                                                                                                                                                                                                                                                                                                        |
|                     |                        | FOXO1     | 1E-02           | 1.2e-04-5.1e-02                 | 99                                  | 3/60                | 5/860               | 2-9/860                                     | DDIT4, EFNA1, MXI1                                                | human, rat                                                                                                                                                                                                                                                                                                                                                                          |
|                     |                        | ZEB1      | 1E-02           | 2.6e-03-3.5e-02                 | 100                                 | 8/60                | 36/860              | 31-45/860                                   | EFNA1, INSIG2, KLF10, NAMPT, P4HA1, RBPJ, STC2, TMEM45A           | chick, chicken, human                                                                                                                                                                                                                                                                                                                                                               |
|                     |                        | STRA13    | 1E-02           | 1.2e-04-5.1e-02                 | 97                                  | 3/60                | 5/860               | 2-9/860                                     | JMJD2C, RARA, SLC16A1                                             | mouse                                                                                                                                                                                                                                                                                                                                                                               |
|                     |                        | MAFB      | 2E-02           | 2.3e-03-3.4e-02                 | 100                                 | 3/60                | 6/860               | 4-8/860                                     | ATF3, LDHA, SPAG4                                                 | Rattus                                                                                                                                                                                                                                                                                                                                                                              |
|                     |                        | EGR       | 2E-02           | 3.8e-03-4.9e-02                 | 100                                 | 7/60                | 32/860              | 26-39/860                                   | ERO1L, GYS1, INSIG2, PJA2, SEC61G, SLC16A1, TGFB1                 | human, monkey, mouse, rat                                                                                                                                                                                                                                                                                                                                                           |
|                     |                        | EIP74EF   | 2E-02           | 7.7e-04-6.1e-02                 | 96                                  | 5/60                | 17/860              | 11-24/860                                   | ANKRD37, GOSR2, INSIG2, PPME1, RSBN1                              | fruit fly                                                                                                                                                                                                                                                                                                                                                                           |
|                     |                        | MAT1      | 2E-02           | 4.0e-03-5.5e-02                 | 98                                  | 4/60                | 12/860              | 9-16/860                                    | EFNA1, MXI1, NAMPT, WSB1                                          | fission yeast                                                                                                                                                                                                                                                                                                                                                                       |
|                     |                        | FOXJ1     | 2E-02           | 2.3e-03-7.1e-02                 | 85                                  | 3/60                | 7/860               | 4-10/860                                    | ANKRD37, MXI1, OXSR1                                              | human, mouse, rat                                                                                                                                                                                                                                                                                                                                                                   |
|                     |                        | STF12     | 2E-02           | 2.3e-03-7.1e-02                 | 91                                  | 3/60                | 7/860               | 4-10/860                                    | JMJD1A, RARA, STC2                                                | yeast                                                                                                                                                                                                                                                                                                                                                                               |
|                     |                        | VDR       | 3E-02           | 2.3e-03-9.5e-02                 | 78                                  | 3/60                | 7/860               | 4-11/860                                    | EIF1, NDRG1, RARA                                                 | chick, domestic pig, human, mouse, rat                                                                                                                                                                                                                                                                                                                                              |
|                     | FOXO1                  | 3E-02     | 3.6e-03-8.5e-02 | 85                              | 5/60                                | 20/860              | 14-26/860           | CLK3, DDIT4, DHX40, EFNA1, MXI1             | clawed frog, human, mouse, rat                                    |                                                                                                                                                                                                                                                                                                                                                                                     |
|                     | USF1                   | 3E-02     | 4.0e-03-7.9e-02 | 85                              | 6/60                                | 27/860              | 20-34/860           | JMJD1A, JMJD2B, JMJD2C, LDHA, RARA, SLC16A1 | chick, duck, hamster, human, mouse, rat                           |                                                                                                                                                                                                                                                                                                                                                                                     |
|                     | MYOD1                  | 3E-02     | 4.0e-03-1.0e-01 | 80                              | 4/60                                | 13/860              | 9-19/860            | JMJD2C, OXSR1, RBPJ, TGFB1                  | chick, clawed frog, human, mouse                                  |                                                                                                                                                                                                                                                                                                                                                                                     |
|                     | PAX6                   | 4E-02     | 2.3e-03-1.2e-01 | 58                              | 3/60                                | 8/860               | 4-12/860            | DHX40, PER2, TMEM45A                        | Japanese quail, chick, clawed frog, human, mouse, rat, zebra fish |                                                                                                                                                                                                                                                                                                                                                                                     |

|                       | Distance from HIF site | name     | mean p-value | p-value range in 100 iterations | found significant in 100 iterations | found in foreground | found in background | range in background /total | genes                                | organism                                                          |
|-----------------------|------------------------|----------|--------------|---------------------------------|-------------------------------------|---------------------|---------------------|----------------------------|--------------------------------------|-------------------------------------------------------------------|
| <b>Down regulated</b> | <b>± 100</b>           | SP1      | 0.0116       | 1.6e-04-4.9e-02                 | 100                                 | 3/21                | 18/881              | 10-28/881                  | CAD, NF2, R3HDM1                     | human, mouse, rat                                                 |
|                       | <b>± 125</b>           | NF-Y     | 0.0015       | 3.8e-05-7.3e-03                 | 100                                 | 4/21                | 23/881              | 16-32/881                  | ABCF2, CYCS, FH, MRPL4               | chick, clawed frog, human, long-tailed hamster, mouse, rat, yeast |
|                       | <b>Entire promoter</b> | CBF:NF-Y | 0.0026       | 2.7e-04-7.3e-03                 | 100                                 | 4/21                | 26/881              | 20-32/881                  | ABCF2, MRPL4, NF2, TPCN1             | human, mouse, rat                                                 |
|                       |                        | RBPJ     | 0.0048       | 7.2e-05-1.1e-02                 | 100                                 | 3/21                | 16/881              | 9-20/881                   | CCNB1, FH, R3HDM1                    | fruit fly, human, mouse                                           |
|                       |                        | YY1      | 0.0114       | 3.8e-03-2.9e-02                 | 100                                 | 5/21                | 50/881              | 43-60/881                  | ATF7IP, EIF2B3, ILF3, R3HDM1, SNRPD1 | chick, human, mouse, rat                                          |
