# Supplementary material for: An integrative genomics approach identifies Hypoxia Inducible Factor-1 (HIF-1)-target genes that form the core response to hypoxia
Source: PubMed Central journal article supplement — Nucleic Acids Res. 2009 Jun 2;37(14):4587–602. doi: 10.1093/nar/gkp425 (PMC2724271; doi:10.1093/nar/gkp425), 2009-06-02
Supplement: gkp425_3.pdf [file gkp425_3.pdf]

| motif length | Sequence | Rank within 100 best motifs | Information content | score   | HIF divergence                                 | Best divergence | Sequence logo |
|--------------|----------|-----------------------------|---------------------|---------|------------------------------------------------|-----------------|---------------|
| 5            | TACGT    | 14                          | 2.12                | 101.234 | M00466 (0.370), M00797 (0.547)                 | 0.370           |               |
| 6            | KCACGT   | 1                           | 1.92                | 247.742 | M00797 (0.313), M00466 (0.313)                 | 0.313           |               |
| 6            | CACGTC   | 3                           | 1.93                | 202.005 | M00797 (0.511), M01234 (0.712), M00466 (0.743) | 0.511           |               |
| 6            | CWCGTA   | 9                           | 1.95                | 182.844 | M00466 (0.487), M00797 (0.634), M01234 (0.945) | 0.487           |               |
| 6            | ACGTGC   | 10                          | 1.92                | 181.946 | M00797 (0.148), M00466 (0.330), M01234 (0.531) | 0.148           |               |
| 7            | TACGTGM  | 11                          | 1.91                | 180.168 | M00466 (0.428), M00797 (0.529), M01234 (0.888) | 0.428           |               |
