# Supplementary material for: An integrative genomics approach identifies Hypoxia Inducible Factor-1 (HIF-1)-target genes that form the core response to hypoxia
Source: PubMed Central journal article supplement — Nucleic Acids Res. 2009 Jun 2;37(14):4587–602. doi: 10.1093/nar/gkp425 (PMC2724271; doi:10.1093/nar/gkp425), 2009-06-02
Supplement: gkp425_4.pdf [file gkp425_4.pdf]

| motif length | Sequence | Rank within 100 best motifs | information content | score   | HIF divergence                                                                                                                                                                     | Best divergence | logo |
|--------------|----------|-----------------------------|---------------------|---------|------------------------------------------------------------------------------------------------------------------------------------------------------------------------------------|-----------------|------|
| 6            | KCACGT   | 1                           | 1.91978             | 247.742 | STRA13 (M00985, 0.046), ARNT (M00539, 0.099)                                                                                                                                       | 0.04593         |      |
| 5            | TTACG    | 1                           | 2.11619             | 140.125 | ATF2 (M00040, 0.170)                                                                                                                                                               | 0.16984         |      |
| 5            | CAATK    | 2                           | 2.01228             | 119.112 | NF-Y (M00687, 0.189)                                                                                                                                                               | 0.18878         |      |
| 6            | CACGTC   | 3                           | 1.92534             | 202.005 | ATF6 (M00483, 0.049)                                                                                                                                                               | 0.04919         |      |
| 5            | MCAAT    | 3                           | 2.00129             | 115.949 | NF-Y (M00209, 0.068), NF-Y (M00687, 0.068), CBF:NF-Y (M00287, 0.073), NF-Y (MA0060, 0.080), CUX1 (M00095, 0.107), NF-Y (M00775, 0.150), NF-Y (M00185, 0.151), NF-Y (M00288, 0.165) | 0.06843         |      |
| 6            | ACGCAC   | 6                           | 1.92524             | 191.691 | NKX5-1 (M00433, 0.129)                                                                                                                                                             | 0.12892         |      |
| 5            | CAATC    | 6                           | 2.11704             | 112.429 | HOXA7 (M01108, 0.000), NF-Y (M00209, 0.000), PBX1 (M00124, 0.039), PBX1 (MA0070, 0.075)                                                                                            | 0               |      |
| 6            | CWCGTA   | 9                           | 1.95266             | 182.844 | O2 (M00010, 0.178)                                                                                                                                                                 | 0.17832         |      |
| 6            | ACGTGC   | 10                          | 1.92453             | 181.946 | HIF-1 (M00797, 0.148), MYC (M01145, 0.244)                                                                                                                                         | 0.1484          |      |
| 5            | CTTGT    | 10                          | 2.11631             | 106.389 | EVI1 (M00011, 0.030)                                                                                                                                                               | 0.02985         |      |
| 5            | TAACC    | 11                          | 2.11704             | 106.136 | AIRE (M01000, 0.076)                                                                                                                                                               | 0.07588         |      |
| 6            | ACGTMA   | 12                          | 1.93625             | 180.88  | CREB1 (M00039, 0.156), XBP1 (M00251, 0.219), ATF2 (M00040, 0.233), AP-1 (M00036, 0.245), ATF6 (M00483, 0.245)                                                                      | 0.15645         |      |
| 6            | CAATCK   | 13                          | 2.02048             | 179.684 | HOXA7 (M01108, 0.000)                                                                                                                                                              | 0.00041         |      |
| 5            | TACGT    | 14                          | 2.11619             | 101.234 | O2 (M00010, 0.000), ATF2 (M00040, 0.156)                                                                                                                                           | 0               |      |
| 6            | YCAATG   | 23                          | 1.94819             | 159.837 | NF-Y (M00687, 0.242)                                                                                                                                                               | 0.24157         |      |
| 5            | TTTCG    | 24                          | 2.11631             | 81.5078 | E2F1 (M00024, 0.153)                                                                                                                                                               | 0.15279         |      |
| 5            | CAAAC    | 26                          | 2.11692             | 81.2489 | FOXJ1 (M00742, 0.100)                                                                                                                                                              | 0.09979         |      |
| 5            | GTTTC    | 27                          | 2.11631             | 79.7911 | STE12 (M00664, 0.000), STAT1 (M00258, 0.000), STAT1 (MA0137, 0.033), IRF8 (M00699, 0.097)                                                                                          | 0               |      |
| 5            | TATGC    | 29                          | 2.11619             | 78.3551 | POU2F1 (M00135, 0.023)                                                                                                                                                             | 0.02275         |      |
| 5            | AACCA    | 36                          | 2.11692             | 72.6666 | AIRE (M01000, 0.134), ZEC (M01081, 0.158)                                                                                                                                          | 0.13391         |      |
| 6            | CCACGT   | 37                          | 1.92534             | 143.621 | O2 (M00010, 0.000), MYC (M01154, 0.093), ATF6 (M00483, 0.098), MAX (MA0059, 0.101), MYC (M01145, 0.139), MAX:MYC (M00118, 0.182), ABZ1 (M01065, 0.236)                             | 0               |      |
| 5            | ATTAA    | 40                          | 2.40347             | 67.8842 | FTZ (M00020, 0.000), NKX6-1 (M00424, 0.027), LHX3 (MA0135, 0.042), LHX3 (M00510, 0.066), AIRE (M01000, 0.194), HNF1A (MA0046, 0.217), HNF1A (M00132, 0.243)                        | 0               |      |
| 5            | AGTCA    | 41                          | 2.11606             | 67.7767 | BACH1 (M00495, 0.000), AP-1 (M00038, 0.019), GCN4 (M00204, 0.172), AP-1 (M00188, 0.222)                                                                                            | 0               |      |
| 6            | ACGTCC   | 43                          | 1.92534             | 123.639 | MIZF (MA0131, 0.171)                                                                                                                                                               | 0.17104         |      |
| 5            | GTTCT    | 44                          | 2.11631             | 63.7766 | AR (M00956, 0.000), AR (M00953, 0.000)                                                                                                                                             | 0               |      |
| 5            | CTACT    | 45                          | 2.11717             | 63.5119 | TOPORS (M00480, 0.092)                                                                                                                                                             | 0.0916          |      |
| 5            | MGATT    | 48                          | 2.00043             | 55.3242 | HOXA7 (M01108, 0.100)                                                                                                                                                              | 0.09951         |      |
| 5            | AACTR    | 50                          | 2.0005              | 45.7452 | STAT1 (M00258, 0.232)                                                                                                                                                              | 0.23163         |      |
